# Supplementary material for: Polyethyleneglycol-Betulinic Acid (PEG-BA) Polymer-Drug Conjugate Induces Apoptosis and Antioxidation in a Biological Model of Pancreatic Cancer
Source: MDPI journal article supplement (doi:10.3390/polym15020448), 2023-01-14
Supplement: s1 [file s1]

## Supplementary Materials

# Polyethyleneglycol-Betulinic Acid (PEG-BA) Polymer-Drug Conjugate Induces Apoptosis and Antioxidation in a Biological Model of Pancreatic Cancer

Karabo Sekopi Mosiane <sup>1</sup>, Ekene Emmanuel Nweke <sup>1</sup>, Mohammed Balogun <sup>2</sup> and Pascaline Nanga Fru <sup>1,\*</sup>

<sup>1</sup> Department of Surgery, School of Clinical Medicine, Faculty of Health Sciences, University of the Witwatersrand, 7 York Road, Parktown, Johannesburg 2193, South Africa

<sup>2</sup> Biopolymer Modification and Therapeutics Lab, Materials Science & Manufacturing, Council for Scientific and Industrial Research, Meiring Naude Road, Brummeria, Pretoria 0001, South Africa

\* Correspondence: pascaline.fru@wits.ac.za; Tel.: +27-11-717-2476, Fax: +27-11-484-2117

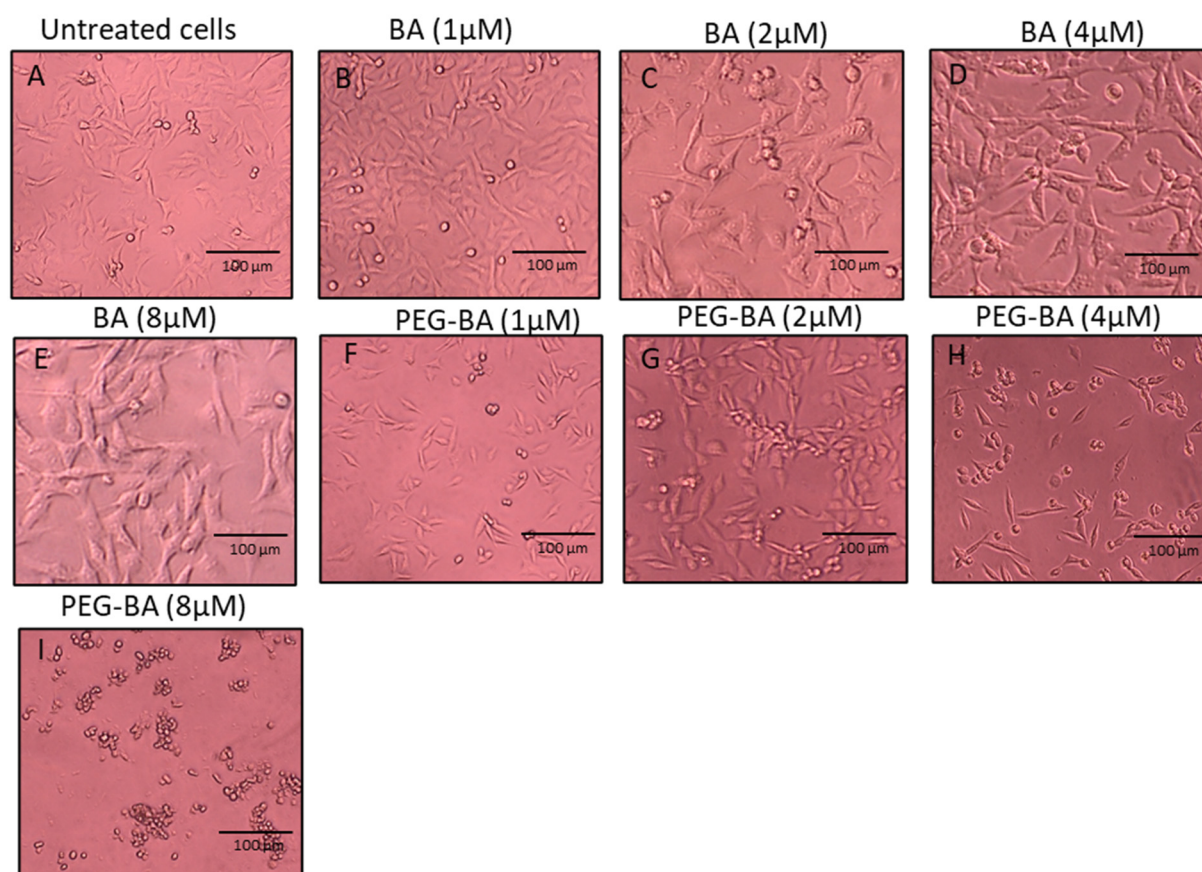

**Figure S1.** Microscopic analysis of BA and PEG-BA treatment on MIA PaCa-2 cells at 24 h. Untreated cells (A) and cells that were treated with varying concentration (1-8 μM) of native BA (B-E) and its conjugate (PEG-BA) (F-I) were analyzed for morphological changes using light microscopy. Compared to the untreated and BA-treated cells, PEG-BA treated cells had a higher percentage of cells that formed clusters of rounded cells, in a dose-dependent manner.

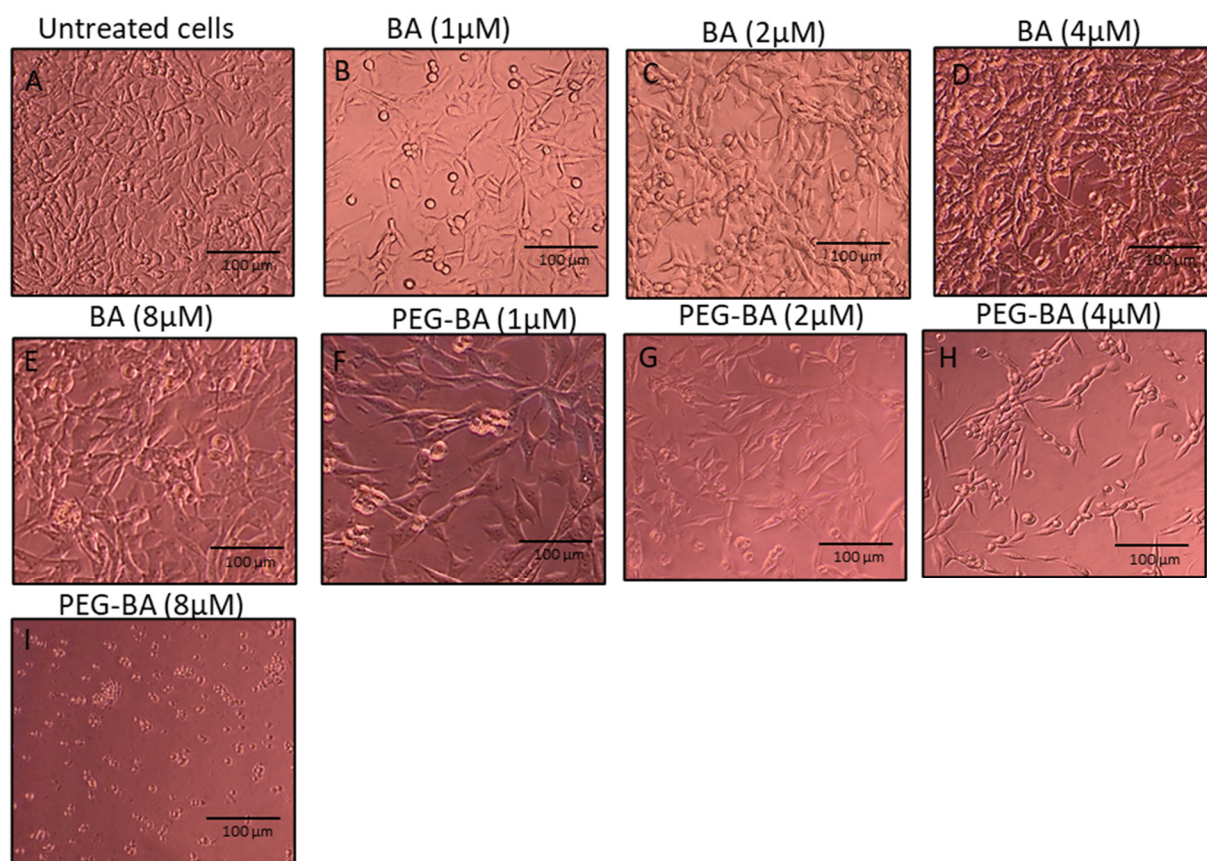

**Figure S2.** Microscopic analysis of BA and PEG-BA treatment on MIA PaCa-2 cells at 48 h. Untreated cells (A) and cells that were treated with varying concentration (1-8  $\mu\text{M}$ ) of native BA (B-E) and its conjugate (PEG-BA) (F-I) were analyzed for morphological changes using light microscopy. Like 24 h, at 48 h, PEG-BA resulted in most of the plated cells forming rounded up cells compared to BA-only, in a dose-dependent manner. This also indicated that PEG-BA induces a toxic effect onto the MIA PaCa-2 cells in a time-dependent manner, since at 48 h, most of the cells start rounding up even at 4  $\mu\text{M}$ .

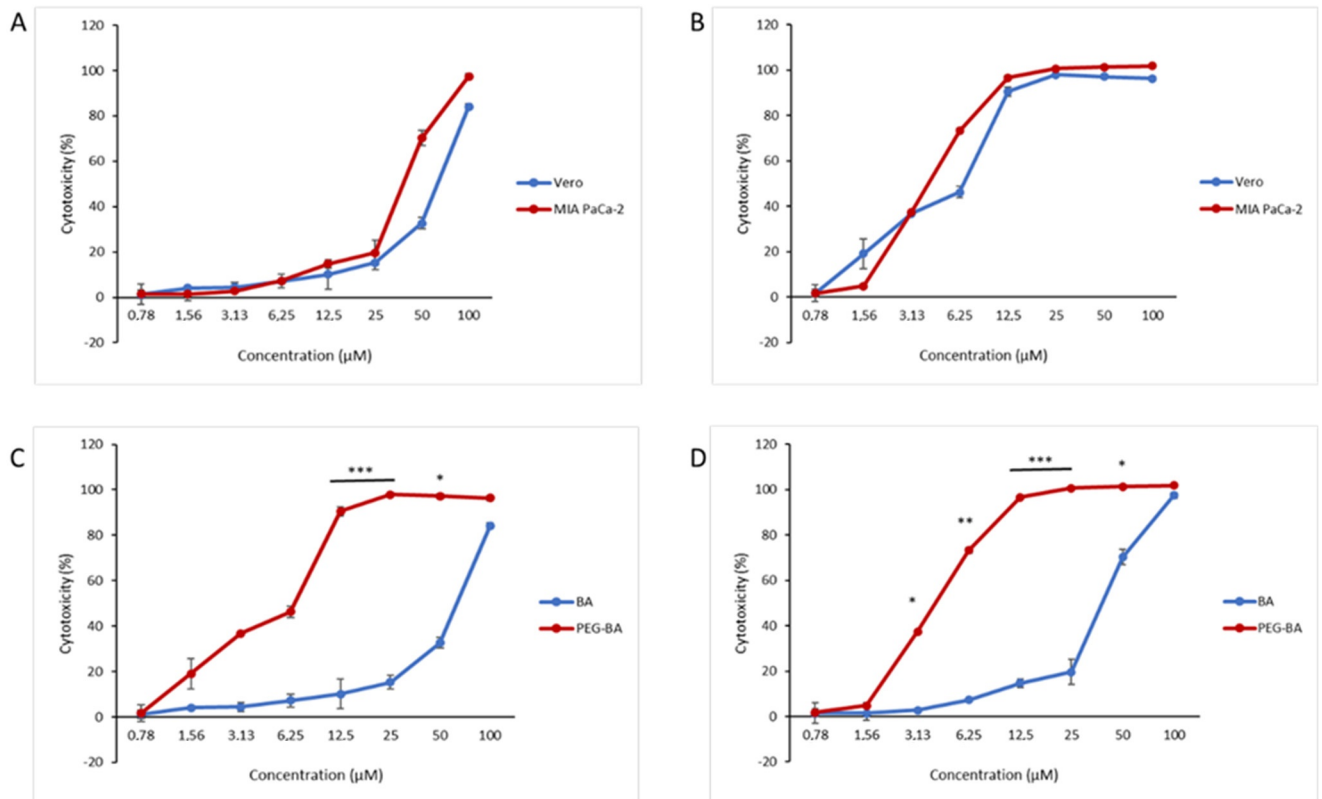

**Figure S3.** Cytotoxic effect of BA and PEG-BA on Vero and MIA PaCa-2 cells. Cells that were treated with varying concentration (0.78-100  $\mu\text{M}$ ) of native BA (A) and its conjugate (PEG-BA) (B) were analysed for cytotoxicity using (XTT) assay. PEG-BA resulted in a higher induction of cytotoxicity than free BA from 12.5-50  $\mu\text{M}$  for Vero cells (C) and from 3.13-50  $\mu\text{M}$  for MIA PaCa-2 cells (D). On both cell lines, BA required at least 25  $\mu\text{M}$  to induce cytotoxicity  $\geq 20\%$  (A). With lower IC<sub>50</sub> values for MIA PaCa-2 cells compared to Vero cells (PEG-BA:  $3.01 \pm 0.62 \mu\text{M}$  vs  $9.02 \pm 0.79 \mu\text{M}$  and BA:  $40.29 \pm 3.60 \mu\text{M}$  vs  $45.06 \pm 6.27 \mu\text{M}$ ). Data represented as mean  $\pm$  SEM (n=4), \*:  $p < 0.05$ , \*\*:  $p < 0.01$  and \*\*\*:  $p < 0.001$ ).
